1 **Safeguarding pollinators requires specific habitat prescriptions and substantially more**  
2 **land area than current policy suggests**

3  
4 **Authors: Alana Pindar<sup>1†</sup>, Adam Hogg<sup>2</sup>, & Nigel E. Raine<sup>1</sup>**

5 **Corresponding author:** <sup>†</sup>apindar@uoguelph.ca

6 **Affiliations:** <sup>1</sup>School of Environmental Sciences, University of Guelph, Guelph ON, N1G 2W1,  
7 Canada; <sup>2</sup>Ministry of Natural Resources and Forestry, Peterborough ON, K9J 8M5, Canada,  
8

9 **Abstract-** Habitat loss and fragmentation are major drivers of global pollinator declines, yet  
10 even after recent unprecedented periods of anthropogenic land-use intensification the amount of  
11 habitat needed to support pollinators remains unknown. Here we use comprehensive datasets to  
12 determine the extent and amount of habitat needed. Safeguarding wild bee communities in a  
13 Canadian landscape requires 11.6-16.7% land-cover from a diverse range of habitats (~1.8-3.6x  
14 current policy guidelines), irrespective of whether conservation aims are enhancing species  
15 richness or abundance. Sensitive habitats, like tallgrass woodlands and wetlands, were important  
16 predictors of bee biodiversity. Conservation strategies that under-estimate the extent of habitat,  
17 spatial scale and specific habitat needs of functional guilds are unlikely to protect bee  
18 communities and the essential pollination services they provide to crops and wild plants.

19 **One sentence summary-** Safeguarding wild bee communities requires 11.6-16.7% of the  
20 **area in common North American landscapes to provide targeted habitat prescriptions for**  
21 **different functional guilds over a variety of spatial scales.**

22 **Main text-**

23 Human-induced land-use changes are driving unprecedented widespread and increasing global  
24 biodiversity losses (1, 2). These alarming declines in biodiversity result in the degradation of  
25 many essential ecosystem services and functions (3, 4), including pollination. Indeed, wild bees  
26 and the pollination services they provide to crops and wild plants are experiencing global  
27 declines in response to intensive anthropogenic landscape changes, climate change, parasites and  
28 diseases, competition from invasive species, and rising agrochemical usage (5, 6).  
29

30 The Sustainable Development Agenda set globally agreed targets to end poverty, protect the  
31 planet, and ensure peace and prosperity for all by 2030 (7). However, less than a decade from  
32 this deadline little apparent progress has been made towards many of these key targets, including  
33 the need to ‘ensure the conservation, restoration and sustainable use of terrestrial and inland  
34 freshwater ecosystems and their services’ (Goal 15.1) (7). Efforts to slow, or even reverse global  
35 pollinator declines have led many countries to initiate conservation strategies in agricultural  
36 areas (8-10), urban environments (11), and other sensitive lands to mitigate the loss of vital  
37 pollinators and the ecosystem services they provide (5, 12).  
38

39 Selection and implementation of specific conservation strategies will strongly depend on  
40 conservation priorities and may differ substantially if the goal is to: (1) enhance pollination by  
41 pollinators visiting particular crops (13, 14), (2) maintain wider pollinator biodiversity (13) or (3)  
42 specifically target the recovery of pollinator species-at-risk (15). Most research to date has  
43 focused on adding and restoring pollinator habitat, typically by planting more abundant and  
44 diverse floral mixtures as food sources (16, 17), and by providing or enhancing nesting sites and  
45 suitable larval host plants (18). Evidence suggests these strategies can be highly effective at

46 increasing pollinator abundance and species richness (8, 19). While bee species richness and  
47 abundance are tightly associated with floral and nesting resources, these associations do not  
48 necessarily predict how much of a specific habitat is needed by any species (19, 20).  
49 Surprisingly, there is not yet any clear understanding of how much of each specific habitat type  
50 is required to support a healthy pollinator community, or indeed over what spatial scales such  
51 habitats are needed. This lack of information not only severely limits the ability to make and  
52 implement evidence-based recommendations to support pollinators at local or landscape scales,  
53 but also jeopardizes the chances of meeting globally agreed Sustainable Development Goals.

54  
55 To address these critical knowledge gaps we compiled an extensive dataset of bees (~63,000  
56 observations from 361 species, 86% of the species recorded from Ontario, Canada, from surveys  
57 over 15 years: 2000-2015) from sites with some degree of anthropogenic land use change (See  
58 Supplementary Information). In intensively managed and simplified ecosystems the provision of  
59 any additional suitable habitat will increase pollinator abundance and diversity (19, 20).  
60 However, at a certain point adding more habitat provides little or no further measurable  
61 pollinator biodiversity benefits (21)(Fig. 1b). We examined the shape of this relationship  
62 between the cumulative number of bee species supported when different amounts of suitable  
63 habitat are found in the landscape (closely following a species-area relationship) to find the point  
64 at which further additional habitat no longer enhanced species richness – a law of diminishing  
65 returns (Fig. 1b, Table S2). Unlike previous attempts at determining the relationships between  
66 bees and habitats within a landscape, our study used ground-truthed land cover data. This is  
67 critical as it provides greater confidence that habitat type designations from map datasets are  
68 meaningful descriptions of the reality of habitats (and critically the resources they provide to  
69 pollinators) on the ground. Furthermore, as different bee species can provide the same ecological  
70 function in different habitats (13), we determined both the extent of habitat and also the key  
71 habitat types required to maintain community species richness and abundance for five functional  
72 groups of bees (solitary ground nesters, social ground nesters, cavity nesters, bumblebees and  
73 cleptoparasites: see Supplementary Materials). Acknowledging that bee species can be highly  
74 mobile (22, 23) and require habitat resources at variable distances from their nests (24), we also  
75 tested which of 27 different habitat types were most widely used by bee communities at twelve  
76 different foraging ranges (in three categories: <500m, 750-1250m, >1500m) within a  
77 representative North American landscape (Fig 1a). To effectively demonstrate which habitats are  
78 most important to different functional groups of bees, and at what spatial scales, we mapped  
79 partial regression ( $\beta$ ) coefficients of the most extensively used habitat types (reported in  
80 GLMMs) to generate habitat prescriptions that can be easily translated by all end-users into  
81 immediate best management practices and real-world conservation actions.

82  
83 Our results suggest that conservation strategies to support wider bee biodiversity should preserve  
84 11.6-16.7% of the land area as suitable habitats within a North American landscape (Fig. 2; 750-  
85 1250m). Current policy recommendations suggest maintaining 6% habitat in UK farmland to  
86 support pollinators based on the expected resource requirements for six common crop-visiting  
87 bee species (9) and an aspirational target to conserve 4.5% of habitat to support pollinators in  
88 Ontario, Canada. Compared to our results, both these policies substantially under-estimate (by  
89 1.8-3.6 times) the amount of habitat needed to support diverse bee communities and safeguard  
90 the pollination services they provide. Any strategies aiming to safeguard pollinator biodiversity

91 using targets below our evidence-based recommendations will likely provide insufficient habitat  
92 for wild bees.

93

94 The full heat map clearly shows a diverse range of habitat types are needed to support wild bee  
95 communities (Fig. S3). However, to help end users successfully prioritise the most important  
96 habitats to maintain, restore or create we filtered the full heat map (by removing habitat types  
97 with interquartile ranges  $<0.25$  for significant  $\beta$  coefficients) to highlight the most important  
98 habitat types in a landscape (Fig. 3). If the goal is to safeguard wider pollinator biodiversity,  
99 more habitat and distinctly different habitat types are required (Fig. 3; Fig. 4a-e) than if the goal  
100 is to enhance crop pollination through increasing the abundance of specific functional groups or  
101 indeed particularly important species (25) (Fig. 3; 4f-j). Specifically, more habitat types  
102 occupying an increased percentage of the landscape at larger spatial scales would need to be  
103 provided to support a greater richness of solitary ground-nesting species in comparison to if the  
104 goal is to maintain their community abundance composition (Fig. 2ai, 4a,f). Functional groups,  
105 other than cavity nesters and cleptoparasites, showed a preference for habitat at foraging  
106 distances between 750-1250m over more localized ( $<500m$ ) and more dispersed scales ( $>1500m$ )  
107 (Fig. 2a). It is likely that the lack of observed changes in the amount of habitat needed to  
108 conserve cleptoparasitic species richness and abundance with respect to distance is because their  
109 distribution will be strongly influenced by the habitat preferences of their host species (Fig 2a, b)  
110 (26).

111  
112 Many of the identified pollinator species-at-risk in North America are bumblebees (27). Given  
113 that these major crop pollinators showed considerable preferences for habitat between 750-  
114 1250m in our study (250-1000m in the UK: 28), we suggest that implementing agri-  
115 environmental conservation schemes in North American landscapes that focus on ensuring  
116 natural/agricultural pollination resources at habitat distances of  $<750m$  will likely miss  
117 opportunities to enhance pollination services provided by wild *Bombus* species (Fig. 2a, b). The  
118 importance of conserving sensitive lands, such as tallgrass woodlands and wetland habitat, for  
119 bee species appeared to far outweigh other habitat types such as hedgerows and semi-natural  
120 habitat (Fig. 3; Fig 4). Wetland and forest edge habitats were significant predictors of species  
121 richness in all bee groups across a range of foraging distances (Fig. 3; Fig. 4).

122  
123 Promoting and maintaining a variety of forest edge habitats in agricultural areas where *Bombus*  
124 species and cavity nesters are the predominant crop pollinators could represent a more effective  
125 strategy to increase crop pollination services than implementing flowering field margins that may  
126 provide less varied nesting opportunities for these target groups (Fig. 3, Fig. 4b, d, g, i). Given  
127 that many habitat losses in North America are the result of natural land conversion to agricultural  
128 uses (29, 30), and that increases in agricultural habitat in landscapes have resulted in significant  
129 loss of phylogenetic diversity in bee communities (31), it is important that environmental policy  
130 in agricultural landscapes consider addition, restoration or creation of wetland habitats. The best  
131 conservation policies for supporting pollinators may also deliver other biodiversity benefits, for  
132 example providing suitable habitat for other beneficial arthropods (e.g. spiders and parasitoid  
133 wasps that can provide crop pest bio-control), birds and other wildlife in the landscape. The  
134 ecosystem services provided by wetlands extend far beyond pollinators - wetlands increase water  
135 table height and therefore quantity of water available for crop irrigation, improve drinking water

136 quality, flood mitigation and provision of habitat for other wildlife, including other species-at-  
137 risk (32).

138

139 It is critical to continue to implement wild pollinator monitoring programs and to identify  
140 specific ecological requirements for individual pollinator species before and after the  
141 implementation of conservation strategies. Such monitoring programs will be the best indicators  
142 of how populations are responding to any new or modified management practices. Overall, we  
143 still know very little about the foraging patterns and flower preferences of the majority of wild  
144 bee species (33), although some species (e.g., *Eucera (Peponapis) pruinosa*, *Nomia melanderi*,  
145 and common bumble bee species) are comparatively well studied.

146

147 In the face of evidence that intensive landscape management can severely limit the diversity and  
148 extent of habitat to support wild pollinators (3,5), global conservation policies must not under-  
149 estimate what the pollinators actually need to survive and thrive. Our results provide clear-cut  
150 habitat prescriptions to support specific conservation needs for wild bees. As a society we need  
151 to have a clear understanding of the specific aims, priorities and outcomes required for pollinator  
152 conservation with regards to crop pollination, maintaining wider biodiversity or targeting key  
153 species-at-risk. Our results clearly highlight that whether supporting species richness or  
154 abundance, the wrong habitat prescription will ultimately continue to prove ineffective for  
155 safeguarding wild pollinator biodiversity and the essential ecosystem services they provide.

156

157 **Acknowledgements-** We would like to thank Mace Vaughan and Laurence Packer for  
158 constructive comments and thoughtful discussions on earlier versions of this manuscript. This  
159 work was funded by the Natural Sciences and Engineering Research Council of Canada  
160 (NSERC) Discovery Grant (2015-06783) and the Food from Thought: Agricultural Systems for a  
161 Healthy Planet Initiative, by the Canada First Research Excellence Fund (grant 000054). A.P.  
162 was supported by the Webster Postdoctoral Fellowship in Environmental Sciences, University of  
163 Guelph and by the Weston Family Foundation. N. E. R. was supported as the Rebanks Family  
164 Chair in Pollinator Conservation by the Weston Family Foundation. We dedicate this manuscript  
165 to the memory of Gordon Taylor, Alana's Dad and constant source of inspiration.

166

167 **Author Contributions-** A.P., A.H., and N.E.R designed the research and analyzed data. A.P and  
168 N.E.R wrote the paper.

169

## 170 **References:**

- 171 1. T. Newbold *et al.*, Global effects of land use on local terrestrial biodiversity. *Nature* **520**,  
172 45-50 (2015).
- 173 2. M. P. Jung *et al.*, Impacts of past abrupt land change on local biodiversity globally. *Nat.*  
174 *Commun.* **10**, 5474 (2019).
- 175 3. A. J. Vanbergen, Landscape alteration and habitat modification: impacts on plant-  
176 pollinator systems. *Curr. Opin. Insect Sci.* **5**, 44-49 (2014).
- 177 4. D. A. Wardle, R. D. Bardgett, R. M. Callaway, W. H. Van der Putten, Terrestrial  
178 ecosystem responses to species gains and losses. *Science* **332**, 1273-1277 (2011).
- 179 5. S. G. Potts *et al.*, Safeguarding pollinators and their values to human well-being. *Nature*  
180 **540**, 220-229 (2016).

- 181 6. G. D. Powney *et al.*, Widespread losses of pollinating insects in Britain. *Nat. Commun.*  
182 **10**, 1018 (2019).
- 183 7. D. o. E. a. S. Affairs, "The Sustainable Development Goals Report 2019," (New York,  
184 NY, 2019).
- 185 8. P. Batáry *et al.*, The role of agri-environment schemes in conservation and environmental  
186 management. *Conserv. Biol.* **29**, 1006-1016 (2015).
- 187 9. L. Dicks *et al.*, How much flower-rich habitat is enough for wild pollinators? Answering  
188 a key policy question with incomplete knowledge. *Ecol. Entomol.* **40**, 22-35 (2015).
- 189 10. Natural England, *Higher Level Stewardship: Environmental Stewardship handbook, 4<sup>th</sup>*  
190 *Edition*. pp. 118 (2013).
- 191 11. K. C. R. Baldock *et al.*, A systems approach reveals urban pollinator hotspots and  
192 conservation opportunities. *Nat. Ecol. Evol.* **3**, 363-373 (2019).
- 193 12. L. V. Dicks, Bees, lies and evidence-based policy. *Nature* **494**, 283 (2013).
- 194 13. R. Winfree *et al.*, Species turnover promotes the importance of bee diversity for crop  
195 pollination at regional scales. *Science* **359**, 791-793 (2018).
- 196 14. B. A. Woodcock *et al.*, Meta-analysis reveals that pollinator functional diversity and  
197 abundance enhance crop pollination and yield. *Nat. Commun.* **10**, 1481 (2019).
- 198 15. G. Lye *et al.*, Assessing the value of Rural Stewardship schemes for providing foraging  
199 resources and nesting habitat for bumblebee queens (Hymenoptera: Apidae). *Biol.*  
200 *Conserv.* **142**, 2023-2032 (2009).
- 201 16. J. Memmott *et al.*, The potential impact of global warming on the efficacy of field  
202 margins sown for the conservation of bumble-bees. *Philos. Trans. R. Soc. B* **365**, 2071-  
203 2079 (2010).
- 204 17. C. M. Kennedy *et al.*, A global quantitative synthesis of local and landscape effects on  
205 wild bee pollinators in agroecosystems. *Ecol. Lett.* **16**, 584-599 (2013).
- 206 18. N. M. Williams, C. Kremen, Resource distribution among habitats determines solitary  
207 bee offspring production in a mosaic landscape. *Ecol. Appl.* **17**, 910-921 (2007).
- 208 19. P. Batáry *et al.*, Landscape-moderated biodiversity effects of agri-environmental  
209 management: a meta-analysis. *Proc. R. Soc. Lond. B* **278**, 1894-1902 (2011).
- 210 20. L. G. Carvalheiro *et al.*, Natural and within-farmland biodiversity enhances crop  
211 productivity. *Ecol. Lett.* **14**, 251-259 (2011).
- 212 21. J. Scheper *et al.*, Environmental factors driving the effectiveness of European  
213 agri-environmental measures in mitigating pollinator loss—a meta-analysis. *Ecol. Lett.*  
214 **16**, 912-920 (2013).
- 215 22. S. S. Greenleaf, N. M. Williams, R. Winfree, C. Kremen, Bee foraging ranges and their  
216 relationship to body size. *Oecologia* **153**, 589-596 (2007).
- 217 23. S. A. Rands, Landscape fragmentation and pollinator movement within agricultural  
218 environments: a modelling framework for exploring foraging and movement ecology.  
219 *PeerJ* **2**, e269 (2014).
- 220 24. N. M. Williams, R. Winfree, Local habitat characteristics but not landscape urbanization  
221 drive pollinator visitation and native plant pollination in forest remnants. *Biol. Conserv.*  
222 **160**, 10-18 (2013).
- 223 25. D. Kleijn *et al.*, Delivery of crop pollination services is an insufficient argument for wild  
224 pollinator conservation. *Nat. Commun.* **6**, 7414 (2015).

- 225 26. F. Vivallo *et al.*, Inferring host-cleptoparasite complexes of South American Centridine  
226 bees (Hymenoptera: Apidae) using macroecological perspectives. *Org. Divers. Evol.* **19**,  
227 179-190 (2019).
- 228 27. S. R. Colla, Status, threats and conservation recommendations for wild bumble bees  
229 (*Bombus* spp.) in Ontario, Canada: a review for policymakers and practitioners. *Nat.*  
230 *Areas J.* **36**, 412-426 (2016).
- 231 28. C. Carvell *et al.*, Bumblebee family lineage survival is enhanced in high-quality  
232 landscapes. *Nature* **543**, 547-549 (2017).
- 233 29. M. E. Sawatzky *et al.*, Landscape context is more important than wetland buffers for  
234 farmland amphibians. *Agric. Ecosyst. Environ.* **269**, 97-106 (2019).
- 235 30. S. van Asselen, P. H. Verburg, J. E. Vermaat, J. J. Janse, Drivers of wetland conversion:  
236 a global meta-analysis. *PLoS One* **8**, e81292 (2013).
- 237 31. H. Grab *et al.*, Agriculturally dominated landscapes reduce bee phylogenetic diversity  
238 and pollination services. *Science* **363**, 282-284 (2019).
- 239 32. A. Begosh *et al.*, Effects of wetland presence and upland land use on wild hymenopteran  
240 and dipteran pollinators in the rainwater basin of Nebraska, USA. *Wetlands*, **40**,1017-  
241 1031 (2020).
- 242 33. A. S. Hadley, M. G. Betts, The effects of landscape fragmentation on pollination  
243 dynamics: absence of evidence not evidence of absence. *Biol. Rev.* **87**, 526-544 (2012).

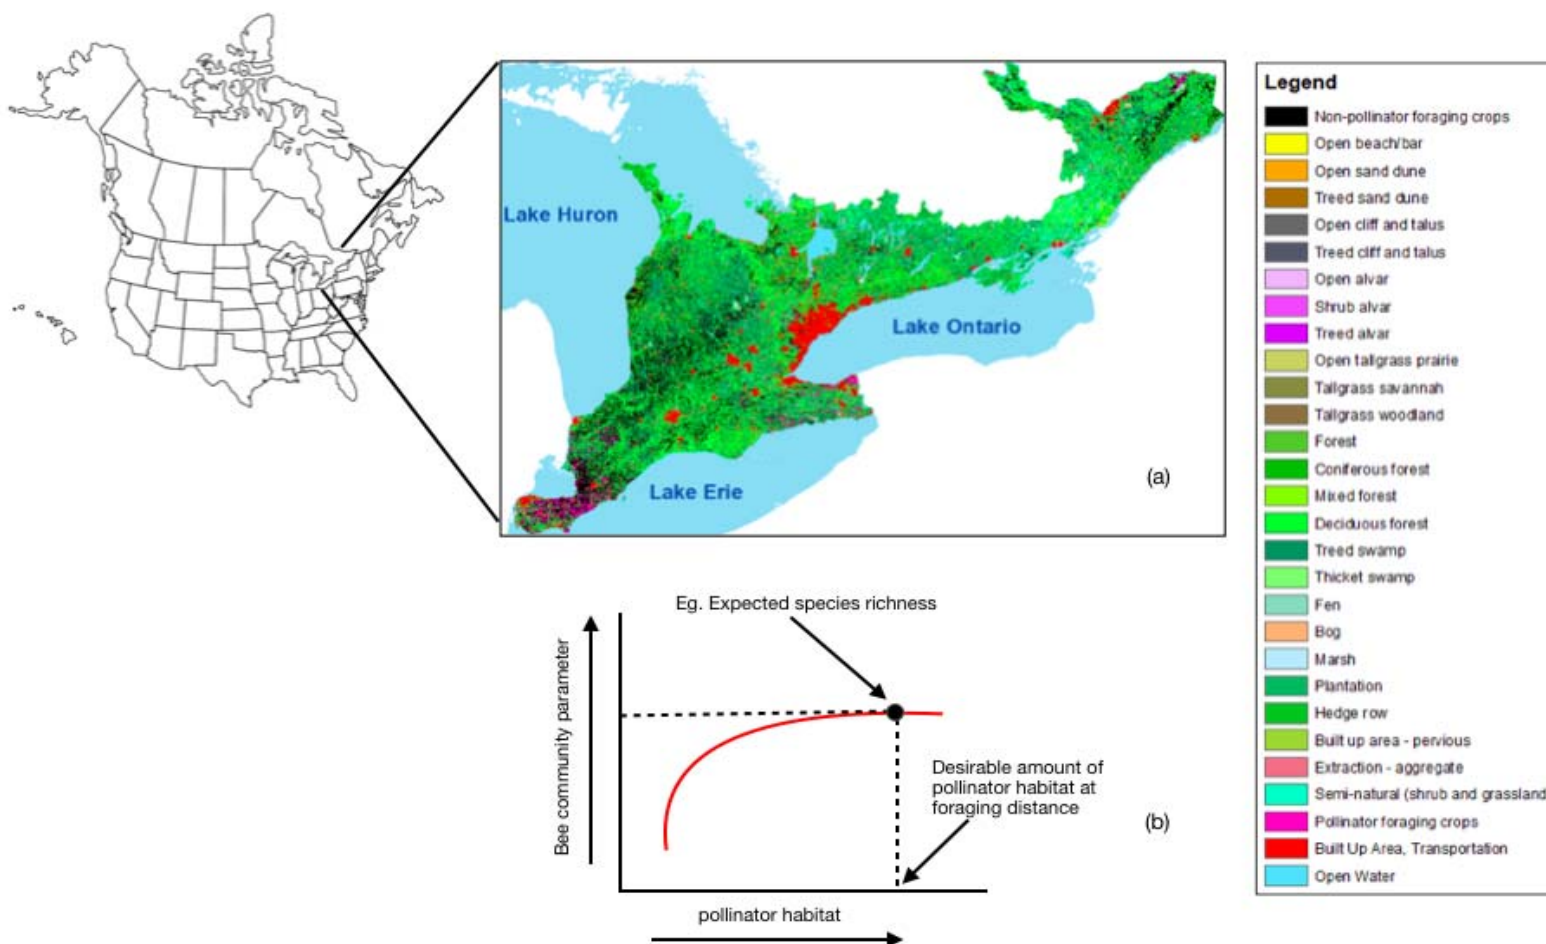

244  
 245 Fig 1. (a) Landscape gradient across Southern Ontario, Canada a typical North American landscape. Red (urban areas), black  
 246 (intensive wind pollinated crops), and light blue (open water areas) reflect areas that provide little or no pollinator habitat. Pink  
 247 represents intensive agricultural crops that provide pollinator foraging, while light- to darker-green colours represent a gradient of  
 248 natural and semi-natural habitats. (b) The expected relationship between extent of pollinator habitat and the bee species richness  
 249 supported in the landscape. Initial increases in the amount of pollinator habitat in a landscape are associated with a steep increase in  
 250 bee species richness. However, the slope of this red line become less steep with additional increases in extent of pollinator habitat,

251 until it reaches asymptote – the optimal landscape composition to support maximal bee species richness (marked with black dotted  
252 lines).



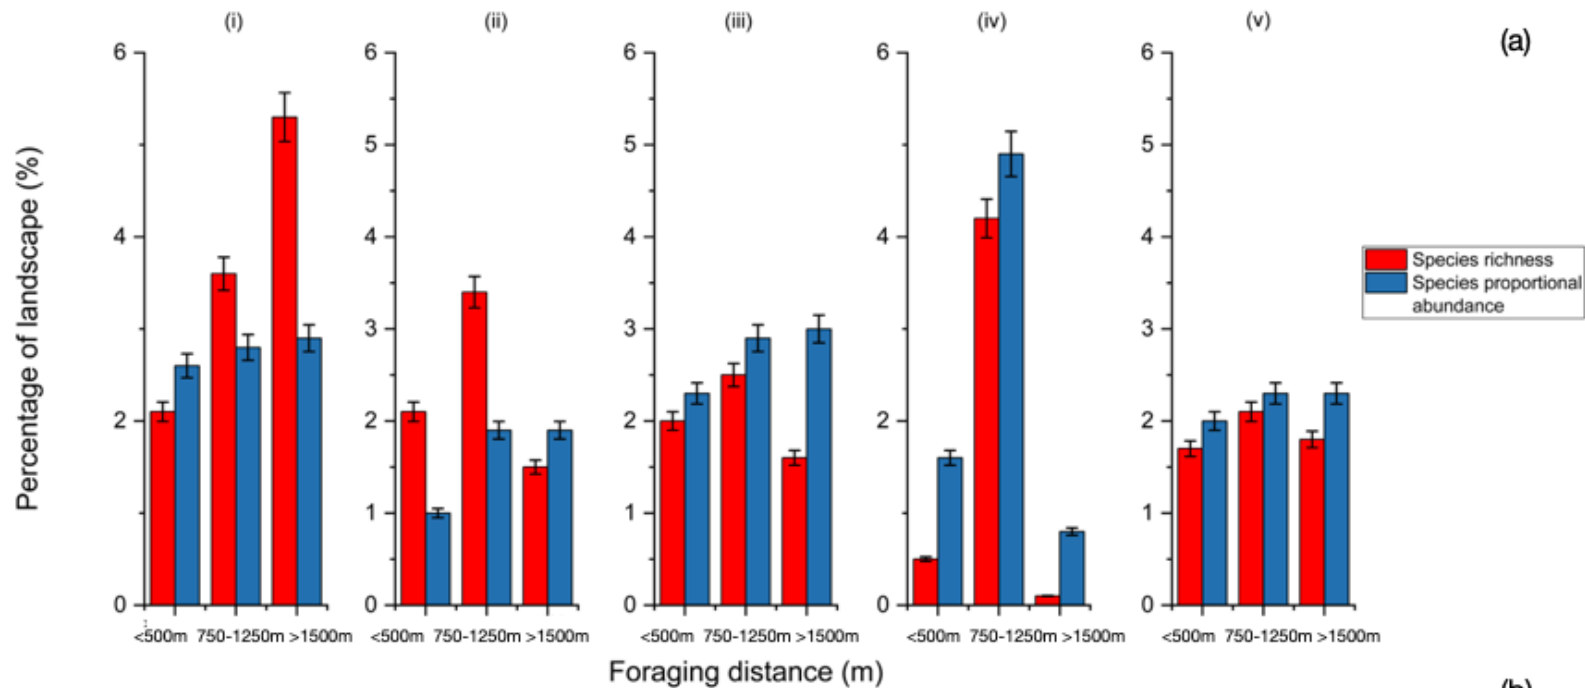

(b)

| Functional guild            | Percentage of habitat |                          |                       |                        |                          |                       |
|-----------------------------|-----------------------|--------------------------|-----------------------|------------------------|--------------------------|-----------------------|
|                             | Species richness      |                          |                       | Proportional abundance |                          |                       |
|                             | >500m<br>(min-max %)  | 750-1250m<br>(min-max %) | <1500m<br>(min-max %) | >500m<br>(min-max %)   | 750-1250m<br>(min-max %) | <1500m<br>(min-max %) |
| (i) Solitary ground nesters | 1.8-2.4               | 3.2-4.1                  | 4.8-5.4               | 1.6-2.6                | 2.7-2.9                  | 2.7-3.0               |
| (ii) Social ground nesters  | 1.5-2.4               | 1.9-3.4                  | 1.5-1.8               | 0.4-1.7                | 1.8-2.0                  | 1.8-1.9               |
| (iii) Cavity nesters        | 1.8-2.0               | 1.7-2.6                  | 2.3-2.6               | 1.5-2.1                | 2.8-2.9                  | 2.7-3.2               |
| (iv) <i>Bombus</i> spp.     | 0.7-1.0               | 3.8-4.3                  | 0.2-0.5               | 1.1-1.7                | 4.1-4.7                  | 1.0-1.3               |
| (v) Cleptoparasites         | 1.3-1.6               | 1.0-2.3                  | 1.1-1.7               | 1.4-1.8                | 1.5-2.1                  | 1.3-2.4               |
| Total wild bee diversity    | 7.1-9.4               | 11.6-16.7                | 9.9-12.0              | 6.0-8.9                | 12.9-14.6                | 9.5-11.8              |

Fig 2. Extent of habitats required within a landscape to maintain the species richness (red-) and proportional abundance (blue columns) of five functional bee guilds: (i) solitary ground nesters, (ii) social ground nesters, (iii) cavity nesters, (iv) bumblebees (*Bombus* spp.), and (v) cleptoparasitic species expected community parameters at each foraging category (<500m, between 750-1500m, and >1500m).

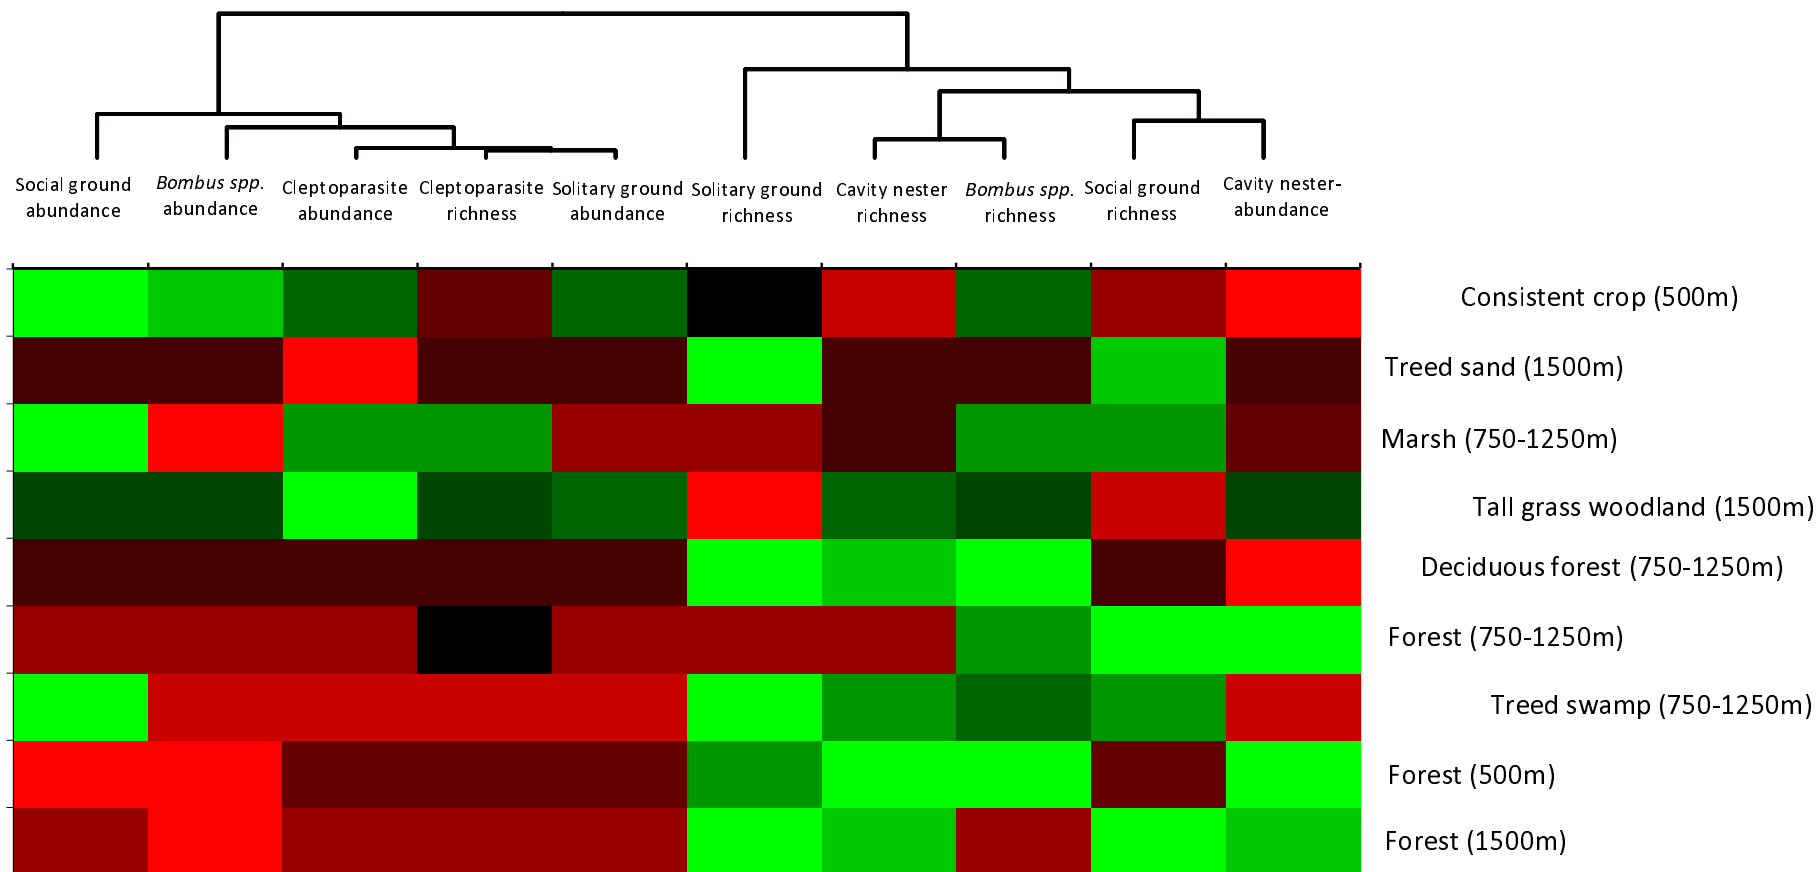

Fig 3. Heat map showing the most important habitat types driving key bee biodiversity metrics (species richness and proportional abundance) of five functional bee guilds: solitary ground nesters, social ground nesters, cavity nesters, bumblebees (*Bombus spp.*), and cleptoparasitic species at three foraging distance categories (<500m, 750-1500m, and >1500m). Lighter shades of green indicate greater use of the habitat at different spatial distances, where darker shades of red suggest a less desirable habitat for supporting functional guild species richness and/or abundance. Habitat similarity is characterized by groupings of alike colours, either among function guilds (horizontal rows) or across spatial distances and habitat types (vertical columns). Forested habitats represented 50m of habitat edges. This is a filtered version of the overall heat map (Fig. S3) from which habitat types with an interquartile ranges of <0.25 of significant  $\beta$  coefficients (habitat types) have been removed. Black cells indicate the habitat has a neutral impact on bee species richness and abundance in the landscape.

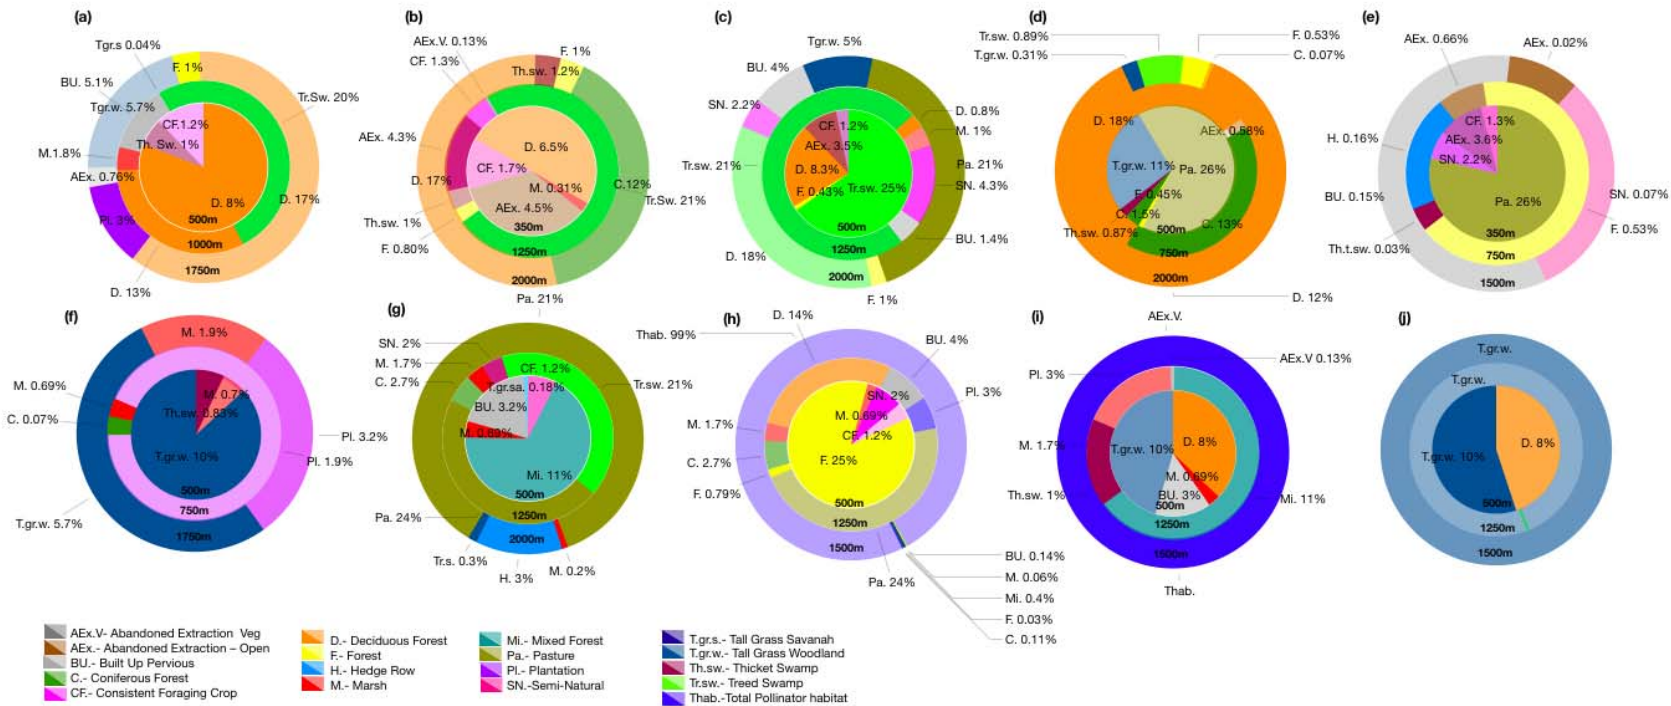

Fig 4. The most preferred habitat types and required percentages at each spatial scale within spatial categories (<500m, 750-1250m, and >1500m) for (a-e) species richness and (f-j) abundance of five bee functional guilds: (a, f) solitary ground nesters; (b, g) social ground nesters; (c, h) cavity nesters; (d, i) bumblebees (*Bombus* spp.); and (e, j) cleptoparasites. Colour shades among habitat types illustrate significant coefficients reported in Tables S8-10. Lighter shades represent significant negative coefficients in models, which represents less critical, but not unpreferred, habitat types.
